# Supplementary material
Source: Springer Nature journal article supplement (https://www.springermedizin.de/resource/supplementary/13063_2014_2228_MOESM2_ESM.pdf/9621684)

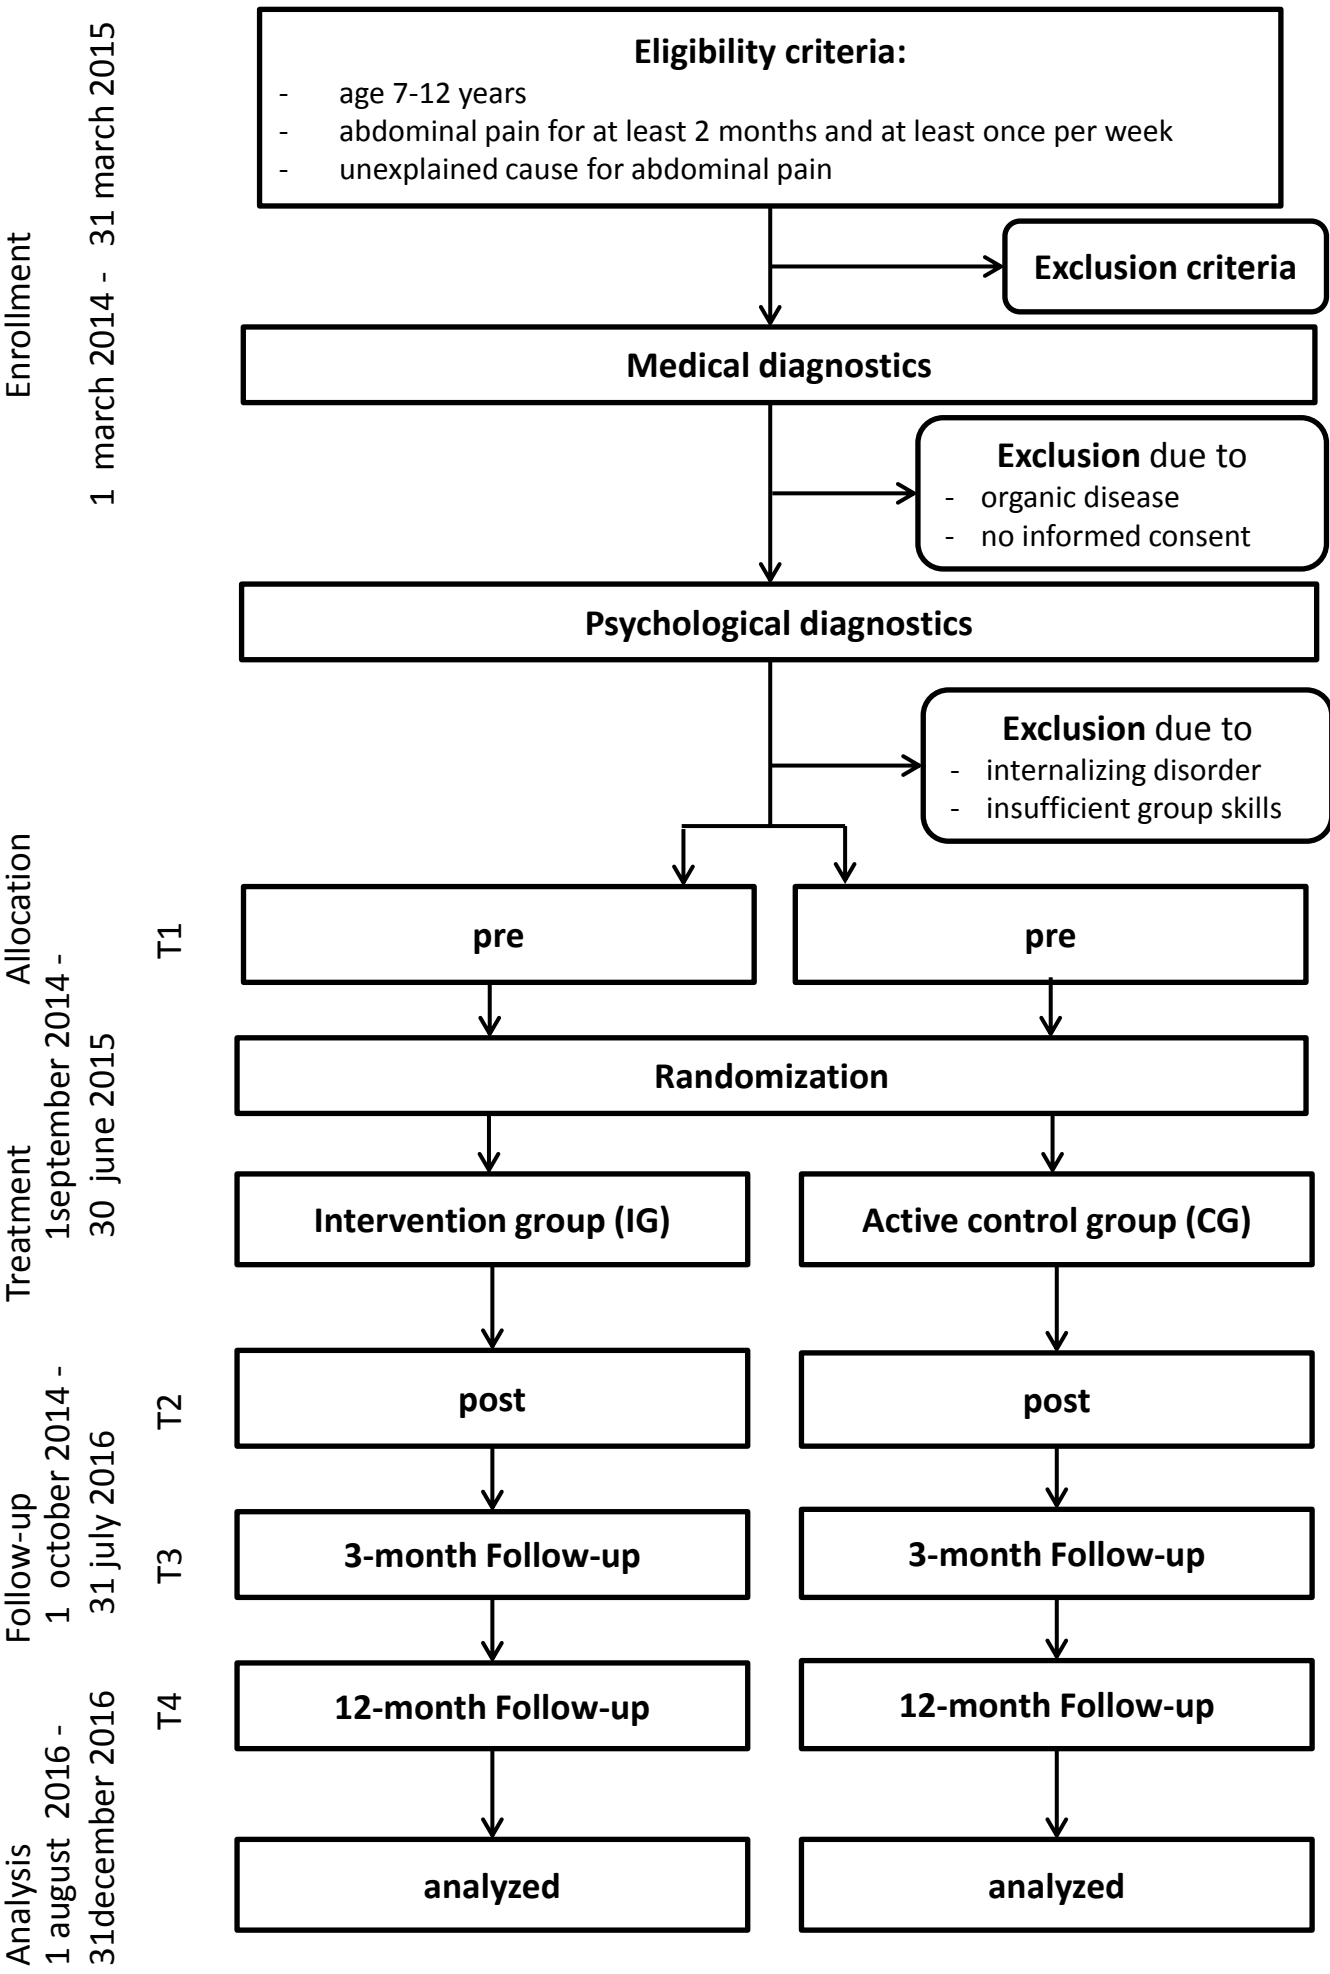

Supplement: MOESM2 [file 9621684]
